# Supplementary material
Source: Springer Nature journal article supplement (https://www.springermedizin.de/resource/supplementary/12885_2013_4041_MOESM4_ESM.pdf/9464998)
Supplement: MOESM4 [file 9464998]

#### Additional File 4. Validation of select genes

| Direction after<br>BAP1 knockdown | Gene<br>Symbol | OCM1A<br>Fold Change | OCM1A<br>T-Test | 92.1<br>Fold Change | 92.1<br>T-Test | Mel290<br>Fold Change | Mel290<br>T-Test | Gene Name                                            |
|-----------------------------------|----------------|----------------------|-----------------|---------------------|----------------|-----------------------|------------------|------------------------------------------------------|
| Up                                | EXTL2          | 2.20                 | 0.000020        | 1.40                | 0.005000       | 1.40                  | 0.000500         | exostoses (multiple)-like 2                          |
| Up                                | FAM175B        | 1.60                 | 0.003000        | 1.50                | 0.005000       | 1.40                  | 0.008000         | FAM175B family with sequence similarity 175          |
| Up                                | MBNL1          | 1.30                 | 0.001000        | 2.10                | 0.000800       | 2.10                  | 0.000001         | muscleblind-like splicing regulator 1                |
| Up                                | PRPF4          | 1.60                 | 0.010000        | 1.50                | 0.000100       | 1.40                  | 0.009000         | PRP4 pre-mRNA processing factor 4 homolog (yeast)    |
| Up                                | UBE2K          | 2.10                 | 0.000002        | 1.30                | 0.003000       | 1.80                  | 0.000300         | UBE2K ubiquitin-conjugating enzyme E2K               |
| Down                              | CKMT1A         | -3.40                | 0.000200        | -5.30               | 0.000600       | -6.80                 | 0.000004         | creatine kinase, mitochondrial 1A                    |
| Down                              | HECTD2         | -2.50                | 0.030000        | -1.30               | 0.003000       | -2.00                 | 0.002000         | HECT domain containing E3 ubiquitin protein ligase 2 |
| Down                              | TNPO1          | -1.80                | 0.000400        | -1.20               | 0.005000       | -1.40                 | 0.030000         | transportin 1                                        |
